# Supplementary material for: Transcriptome and Expression Profiling Analysis of Recalcitrant Tea (Camellia sinensis L.) Seeds Sensitive to Dehydration
Source: Int J Genomics. 2018 Jun 5;2018:5963797. doi: 10.1155/2018/5963797 (PMC6008840; doi:10.1155/2018/5963797)
Supplement: Supplementary 9 — Table S5: DEGs related to ABA biosynthesis and signal transduction. [file 5963797.f9.xlsx]

## Sheet: DEGs
Table S5：DEGs related to ABA biosynthesis and signal transduction.
Gene ID	Annotation	FPKM			D1 vs. D0			D2 vs. D0
		D0	D1	D2	Log2 Ratio(D1/D0)	P-value	FDR	Log2 Ratio(D2/D0)	P-value	FDR
Unigene55189	Zeaxanthin epoxidase	8.65	3.24	2.71	-1.41671	5.24844e-08	4.63147e-07	-1.67441	6.7967e-10	7.51775e-09
Unigene55164	9-cis-epoxycarotenoid dioxygenase	4.75	9.58	7.05	1.0121	6.77546e-05	0.000375738	0.569696	0.0378382	0.103099
CL2122.Contig1	Aldehyde oxidase	3.18	0.001	0.001	-11.6348	1.39838e-24	4.28696e-23	-11.6348	1.02314e-24	3.25439e-23
CL2122.Contig2	Aldehyde oxidase	10.1	3.81	3.52	-1.40649	1.53968e-18	3.32073e-17	-1.52071	1.74437e-20	4.38395e-19
Unigene18827	PYR1-like	26.87	9.8	8.81	-1.45514	5.89478e-13	8.53682e-12	-1.60878	1.30427e-14	2.21534e-13
Unigene40363	PYR1-like	43.43	27.27	21.4	-0.671377	8.68226e-07	6.50892e-06	-1.02108	1.77789e-12	2.5256e-11
CL5.Contig3	Protein phosphatase 2C	11.33	2.35	1.19	-2.26942	5.71732e-19	1.26973e-17	-3.25111	6.5389e-28	2.40106e-26
CL250.Contig1	Protein phosphatase 2C	157.99	323.67	329	1.03469	3.18106e-96	5.32018e-94	1.05825	1.04754e-101	1.88291e-99
CL1175.Contig1	Protein phosphatase 2C	15.59	3.8	3.34	-2.03655	5.29896e-17	1.03766e-15	-2.2227	6.59174e-19	1.50399e-17
CL1808.Contig1	Protein phosphatase 2C	6.2	13.4	12.59	1.11189	4.8672e-11	5.95421e-10	1.02194	2.23632e-09	2.33627e-08
CL1808.Contig5	Protein phosphatase 2C	0.001	17.59	17.02	14.1025	2.27254e-112	4.64737e-110	14.0549	4.67746e-109	9.02599e-107
CL1938.Contig2	Protein phosphatase 2C	4.81	2.48	1.2	-0.955697	0.00338592	0.0131651	-2.003	3.47738e-07	2.79379e-06
CL2039.Contig3	Protein phosphatase 2C	15.8	11.11	7.68	-0.508066	0.00272668	0.0107573	-1.04075	1.43029e-08	1.36323e-07
CL2420.Contig1	Protein phosphatase 2C	15.39	5.75	6.4	-1.42036	3.58318e-07	2.83204e-06	-1.26585	2.97272e-06	2.08919e-05
CL3369.Contig2	Protein phosphatase 2C	24.69	11.93	14	-1.04933	4.32844e-14	6.88337e-13	-0.8185	7.1866e-10	7.93124e-09
CL3422.Contig2	Protein phosphatase 2C	5.27	0.001	0.51	-12.3636	2.46744e-17	4.94771e-16	-3.36923	4.15058e-12	5.7078e-11
CL3729.Contig4	Protein phosphatase 2C	11.42	0.001	0.001	-13.4793	1.27872e-30	5.11117e-29	-13.4793	8.65286e-31	3.59747e-29
CL5243.Contig3	Protein phosphatase 2C	11.79	4.96	7.06	-1.24915	4.3956e-09	4.36968e-08	-0.739824	0.00015582	0.000826728
CL5866.Contig4	Protein phosphatase 2C	29.31	13.09	23.21	-1.16293	9.66612e-08	8.22477e-07	-0.336646	0.0769212	0.17886
CL6354.Contig7	Protein phosphatase 2C	0.001	10.82	1.55	13.4014	1.91397e-48	1.363e-46	10.5981	2.73516e-07	2.23013e-06
CL6354.Contig8	Protein phosphatase 2C	8.01	10.38	26.93	0.373932	0.0352038	0.0955362	1.74934	4.52156e-36	2.31288e-34
CL7543.Contig3	Protein phosphatase 2C	5.38	2.67	1.92	-1.01077	0.000299784	0.00147189	-1.4865	1.86025e-06	1.34439e-05
CL9932.Contig1	Protein phosphatase 2C	24.9	57.72	66.76	1.21293	1.44888e-29	5.51967e-28	1.42284	4.70276e-43	3.05301e-41
Unigene8537	Protein phosphatase 2C	4.56	9.29	7.51	1.02664	5.96172e-05	0.000335949	0.719779	0.00749594	0.0265694
Unigene32214	Protein phosphatase 2C	2.06	13.05	13.79	2.66333	1.55539e-17	3.15785e-16	2.74291	4.78034e-19	1.10026e-17
Unigene35866	Protein phosphatase 2C	13.83	3.11	4.07	-2.15281	3.17606e-14	5.07947e-13	-1.7647	3.45632e-11	4.36347e-10
Unigene35867	Protein phosphatase 2C	6.35	1.7	1.94	-1.90122	5.979e-07	4.56541e-06	-1.7107	2.65782e-06	1.87779e-05
CL6175.Contig4	SNF1-related protein kinase	28.55	0.001	0.001	-14.8012	1.10303e-71	1.30295e-69	-14.8012	4.3883e-72	5.40908e-70
